# Supplementary material for: Enhanced Efficiency of Dye-Sensitized Solar Cells Based on Polymer-Assisted Dispersion of Platinum Nanoparticles/Carbon Nanotubes Nanohybrid Films as FTO-Free Counter Electrodes
Source: MDPI journal article supplement (doi:10.3390/polym13183103), 2021-09-15
Supplement: s1 [file s1]

Liang-Yih Chen <sup>2</sup>, and Chih-Wei Chiu <sup>1,\*</sup>

<sup>2</sup>Department of Chemical Engineering, National Taiwan University of Science and Technology, Taipei 10607, Taiwan

<sup>†</sup> These authors contributed equally to this work.

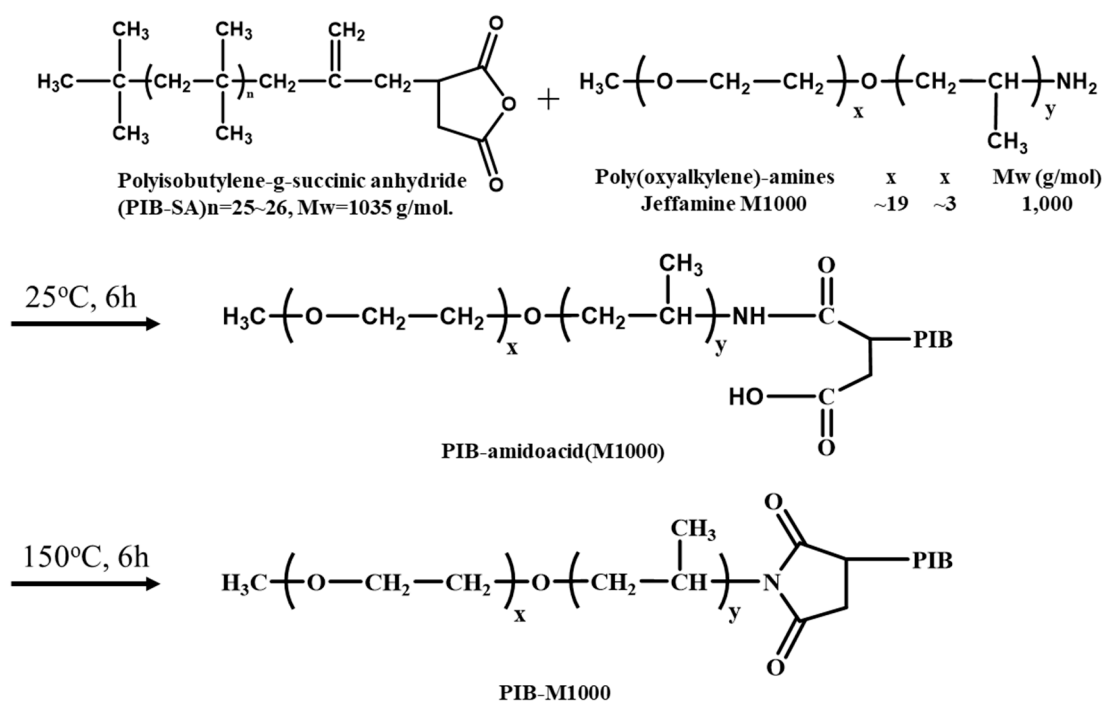

**Figure S1.** PIB-M1000 block copolymer synthesized from polyisobutylene-g-succinic anhydride and polyetheramine monoamine functional group Jeffamine M1000 through amination and imidization.

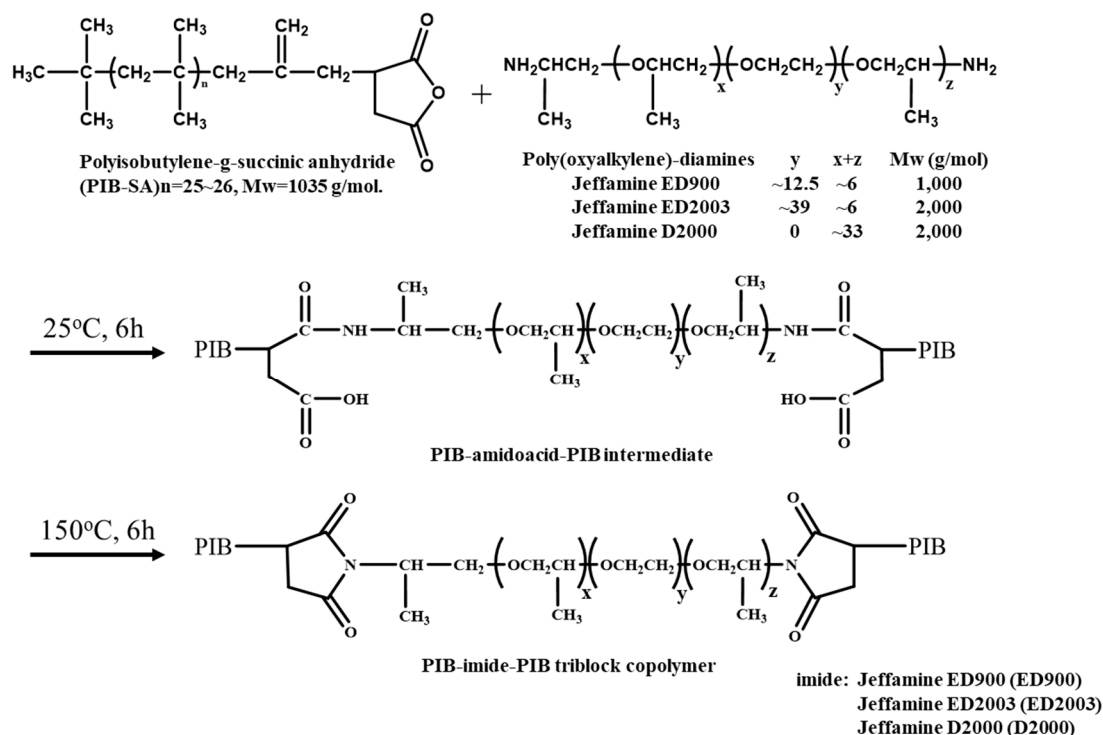

**Figure S2.** PIB-imide-PIB triblock copolymer synthesized from polyisobutylene-g-succinic anhydride and polyetheramine diamine functional groups Jeffamine ED900, ED2003, D2000 through amination and imidation.

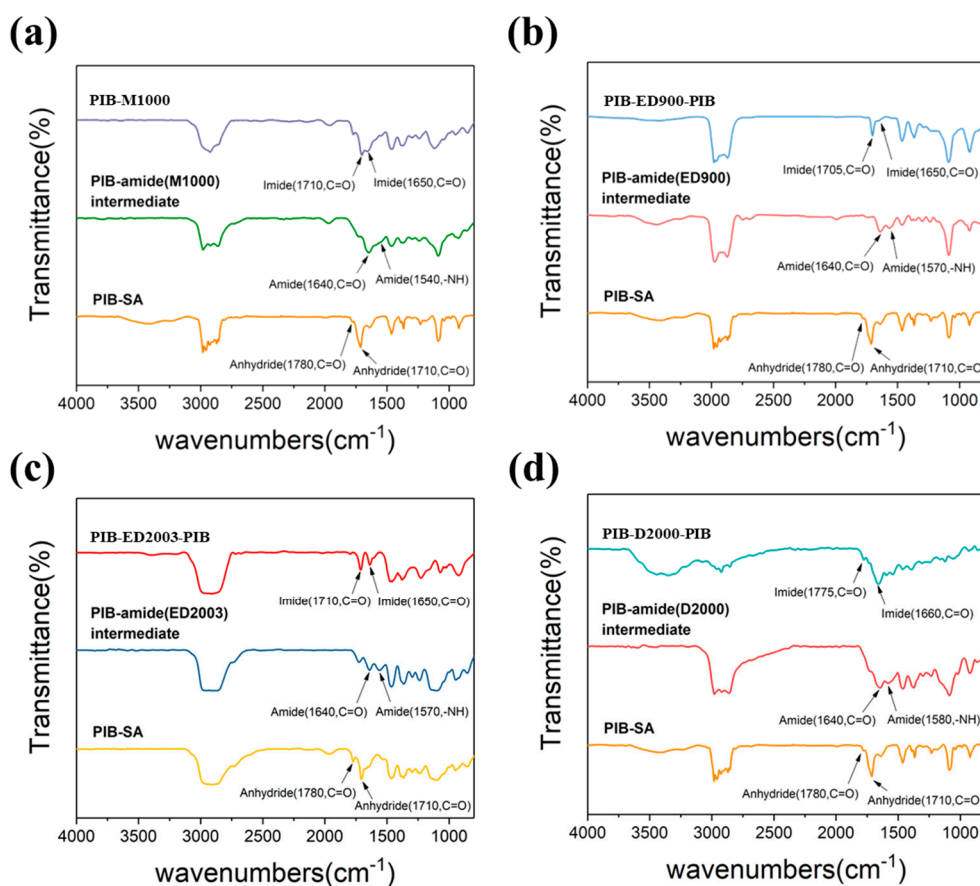

**Figure S3.** FTIR spectra of reactions with (a) PIB-M1000, (b) PIB-ED900-PIB, (c) PIB-ED2003-PIB, and (d) PIB-D2000-PIB.

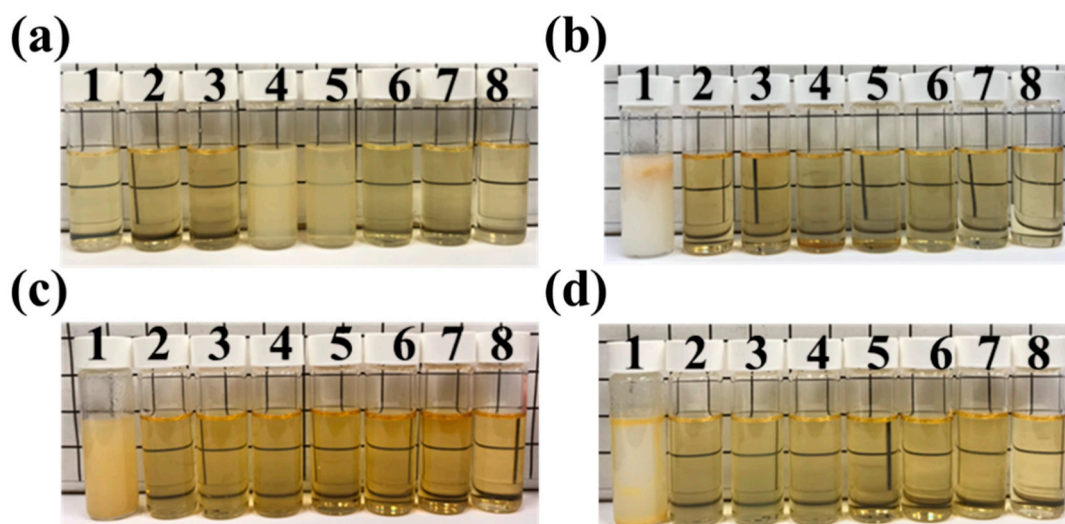

**Figure S4.** Photos of solubility tests with (a) PIB-M1000, (b) PIB-ED900-PIB, (c) PIB-ED2003-PIB, and (d) PIB-D2000-PIB on (1) H<sub>2</sub>O, (2) DMF, (3) NMP, (4) EtOH, (5) Acetone, (6) MEK, (7) THF, and (8) Toluene.

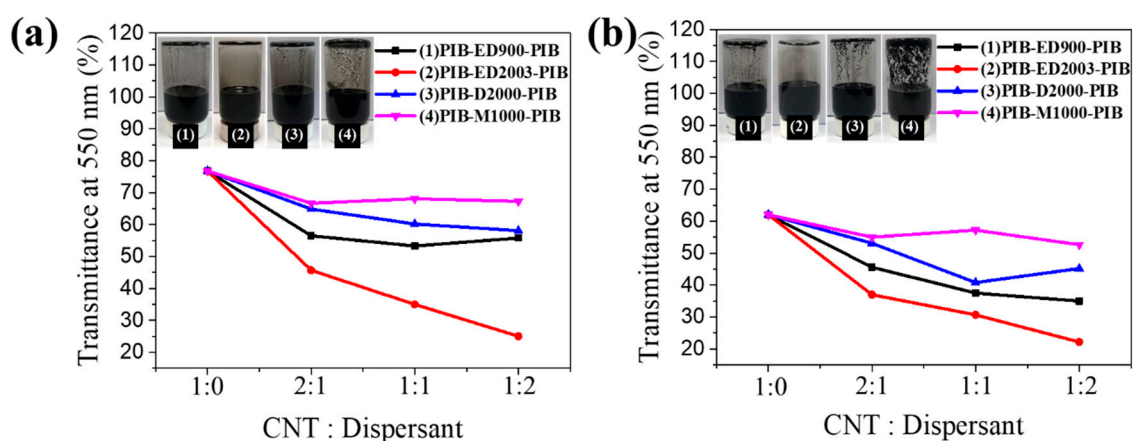

**Figure S5.** Influences of different dispersants on the penetration of solutions with different weight ratios of carbon nanotubes at a wavelength of 550 nm after (a) 2 days, (b) 20 day of storage and actual photos of the solutions.

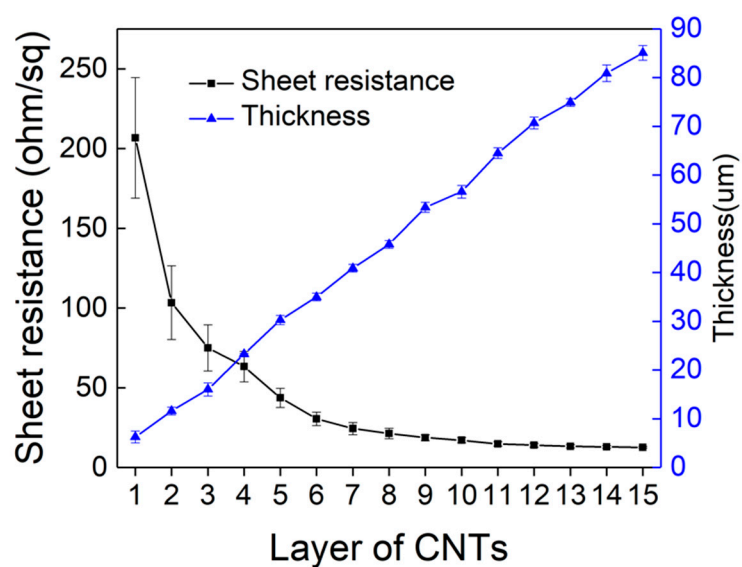

**Figure S6.** Corresponding resistance and thickness based on different numbers of coating layers.

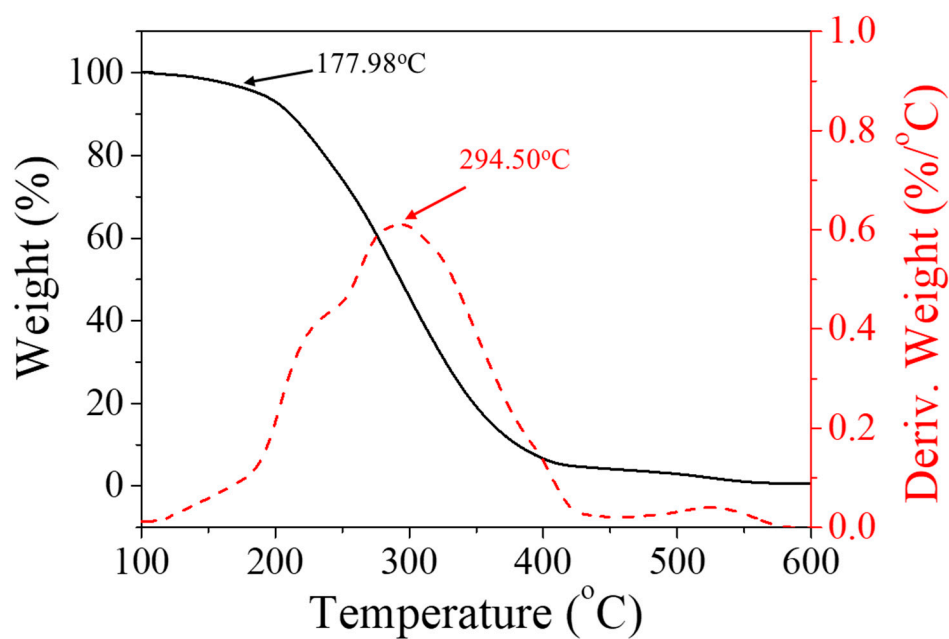

**Figure S7.** TGA and DTG curves of PIB-ED2003-PIB.

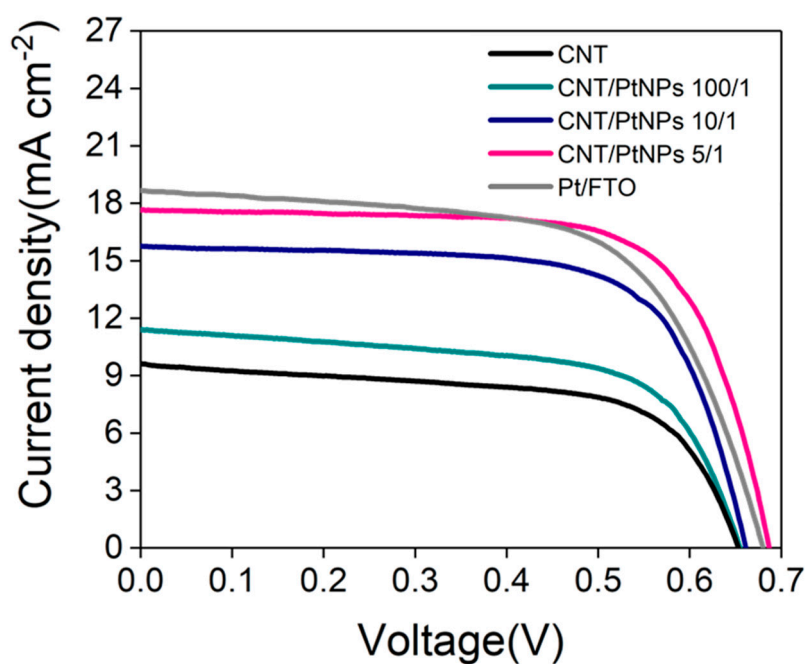

**Figure S8.** J-V curves of counter electrodes made of carbon nanotubes/platinum nanoparticles at different ratios without FTO, and J-V curves of counter electrodes made of carbon nanotubes/platinum nanoparticles at different ratios with FTO.

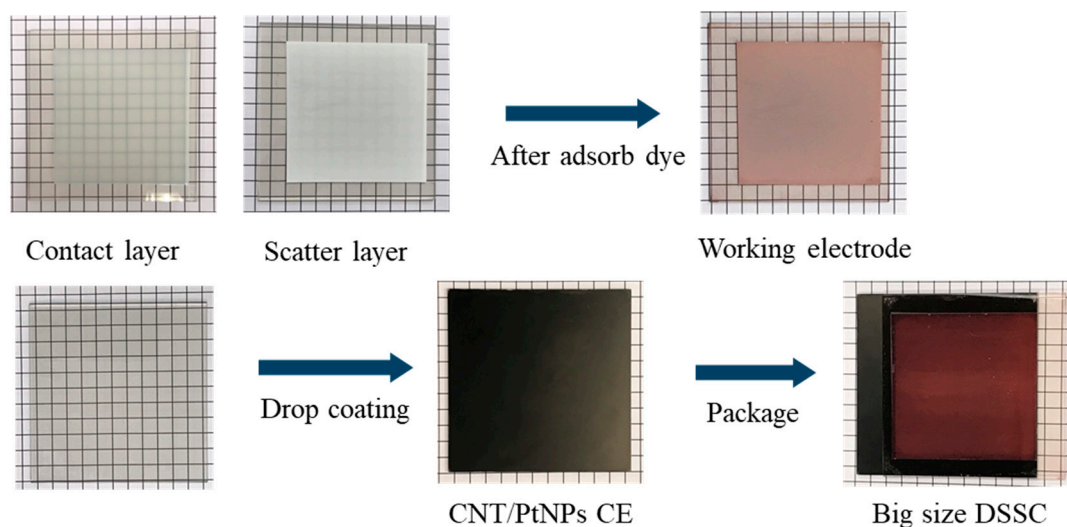

**Figure S9.** Schematic of large-scale (8 cm x 8 cm) DSSC fabrication.

**Table S1.** Solubility test results of various dispersants in different solvents.

| Dispersant     | Solvent <sup>a</sup> |     |     |      |         |     |     |         |
|----------------|----------------------|-----|-----|------|---------|-----|-----|---------|
|                | H <sub>2</sub> O     | DMF | NMP | EtOH | Acetone | MEK | THF | Toluene |
| PIB-SA         | -                    | -   | +-  | -    | -       | -   | +   | +       |
| M1000          | +                    | +   | +   | +    | +       | +   | +   | +       |
| PIB-M1000      | +                    | +   | +   | +    | +       | +   | +   | +       |
| ED900          | +                    | +   | +   | +    | +       | +   | +   | +       |
| PIB-ED900-PIB  | -                    | +   | +   | +-   | +-      | +   | +   | +       |
| ED2003         | +                    | +   | +   | +    | +       | +   | +   | +       |
| PIB-ED2003-PIB | +-                   | +   | +   | +    | +       | +   | +   | +       |
| D2000          | -                    | +   | +   | +    | +       | +   | +   | +       |
| PIB-D2000-PIB  | -                    | +   | +   | +    | +       | +   | +   | +       |

<sup>a</sup> Concentration maintain in 0.2g /10 ml. +:soluble; + -:soluble but forming sediments after 2h sonication; -: insoluble.

**Table S2.** Data for efficiency analysis of DSSCs of different working areas.

| DSCC                         | V <sub>oc</sub><br>(V) | J <sub>sc</sub><br>(mA/cm <sup>2</sup> ) | FF   | η<br>(%) |
|------------------------------|------------------------|------------------------------------------|------|----------|
| Small size DSSC <sup>a</sup> | 0.68                   | 17.50                                    | 0.71 | 8.45     |
| Big size DSSC <sup>b</sup>   | 0.66                   | 17.45                                    | 0.69 | 7.95     |

<sup>a</sup> working area = 0.4 cm × 0.4 cm.<sup>b</sup> working area = 8 cm × 8 cm.
